# Supplementary material for: Molecular assembly of highly symmetric molecules under a hydrogen bond framework controlled by alkyl building blocks: a simple approach to fine-tune nanoscale structures
Source: Royal Society of Chemistry journal article supplement (doi:10.1039/c5sm02005k), 2015-10-09
Supplement: c5sm02005k1.pdf [file c5sm02005k1.pdf]

# **Molecular Assembly of Highly Symmetric Molecules under Hydrogen Bond Framework Controlled by Alkyl Building Blocks: A Simple Approach to Fine-tune Nano-scale Structures**

*Pimsai Tanphibal<sup>a</sup>, Kohji Tashiro<sup>\*\*b</sup> and Suwabun Chirachanchai<sup>\*,a,c</sup>*

*<sup>a</sup>The Petroleum and Petrochemical College, Chulalongkorn University, Bangkok 10330, Thailand*

*<sup>b</sup>Department of Future Industry-oriented Basic Science and Materials, Toyota Technological Institute,*

*Tempaku, Nagoya 468-8511, Japan*

*<sup>c</sup>Center for Petroleum, Petrochemical, and Advance Materials, Chulalongkorn University, Bangkok*

*10330, Thailand*

Corresponding author E-mail address: \*[csuwabun@chula.ac.th](mailto:csuwabun@chula.ac.th), \*\*[ktashiro@toyota-ti.ac.jp](mailto:ktashiro@toyota-ti.ac.jp)

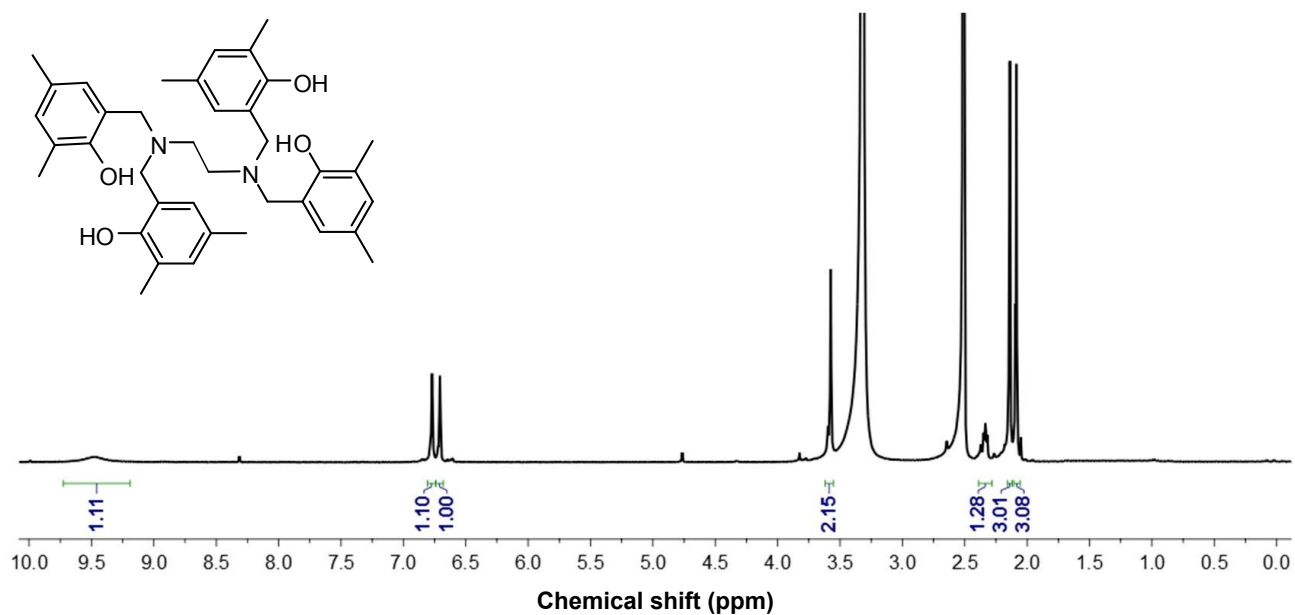

**Figure S1.**  $^1\text{H-NMR}$  spectrum of **C2** in  $\text{DMSO-}d_6$  (500 MHz) at 25 °C.

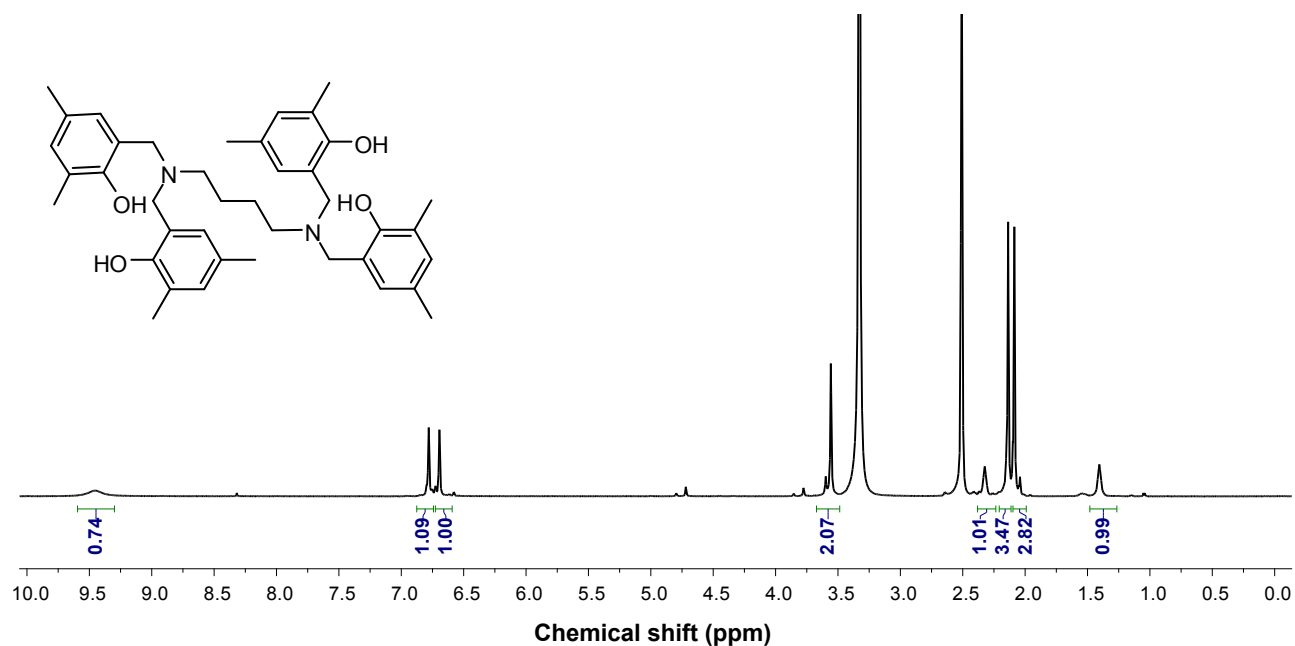

**Figure S2.**  $^1\text{H-NMR}$  spectrum of **C4** in  $\text{DMSO-}d_6$  (500 MHz) at 25 °C.

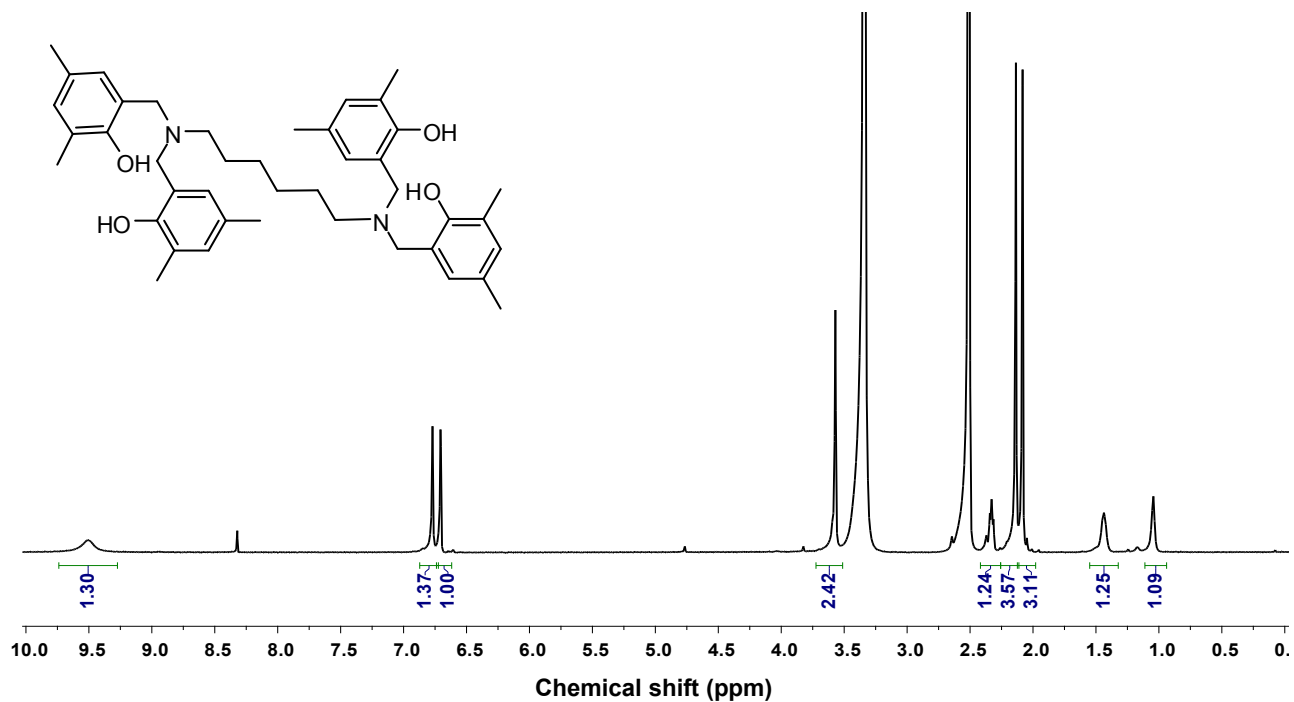

**Figure S3.** <sup>1</sup>H-NMR spectrum of C6 in DMSO-*d*<sub>6</sub> (500 MHz) at 25 °C.

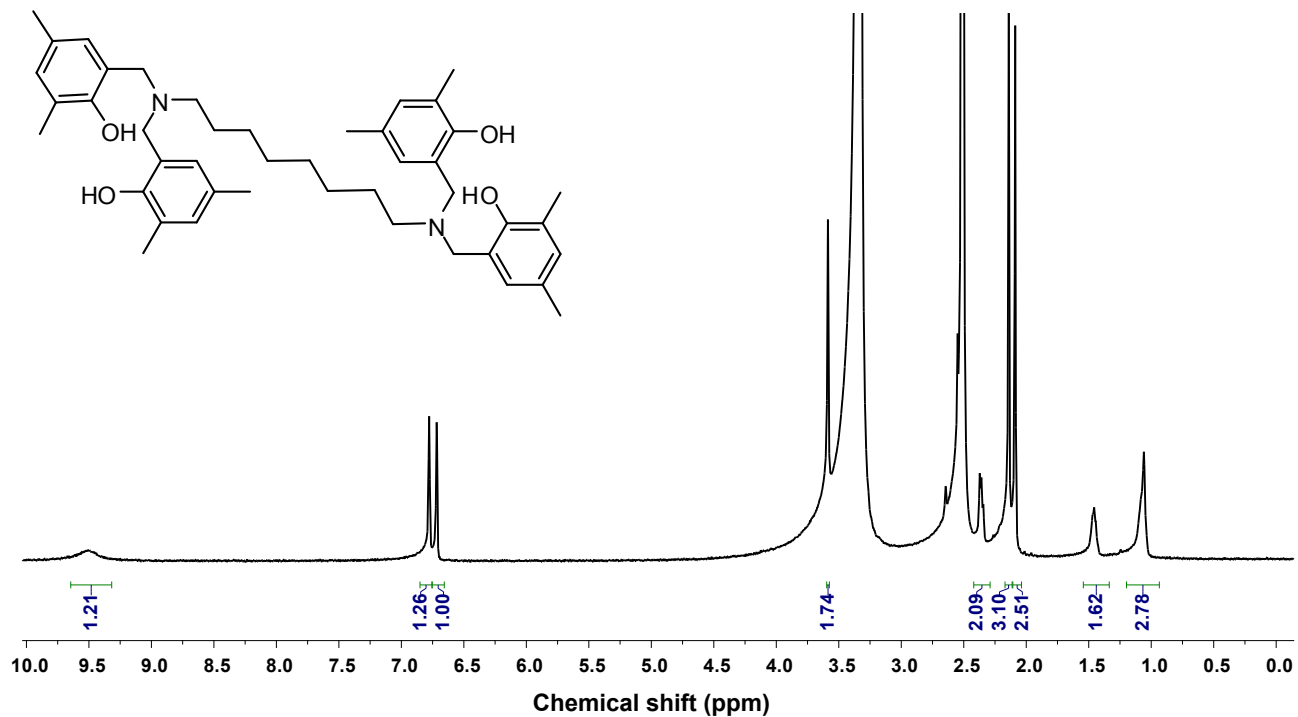

**Figure S4.** <sup>1</sup>H-NMR spectrum of C8 in DMSO-*d*<sub>6</sub> (500 MHz) at 25 °C.

**Table S1.** Crystal data and structure refinement parameters for **C2**, **C4**, **C6**, and **C8**.

| <b>Compound</b>                                  | <b>C2</b>                                                     | <b>C4</b>                                                       | <b>C6</b>                                                     | <b>C8</b>                                                     |
|--------------------------------------------------|---------------------------------------------------------------|-----------------------------------------------------------------|---------------------------------------------------------------|---------------------------------------------------------------|
| Empirical Formula                                | C <sub>38</sub> H <sub>48</sub> N <sub>2</sub> O <sub>4</sub> | C <sub>42</sub> H <sub>58</sub> N <sub>2</sub> O <sub>5</sub> S | C <sub>42</sub> H <sub>56</sub> N <sub>2</sub> O <sub>6</sub> | C <sub>44</sub> H <sub>60</sub> N <sub>2</sub> O <sub>4</sub> |
| Formula weight                                   | 596.81                                                        | 702.99                                                          | 652.92                                                        | 680.97                                                        |
| Crystal system                                   | Triclinic                                                     | Monoclinic                                                      | Monoclinic                                                    | Tetragonal                                                    |
| Space group                                      | $P\bar{1}$                                                    | $P2_1/c$                                                        | $C2/c$                                                        | $P4_212$                                                      |
| <i>Unit cell dimension</i>                       |                                                               |                                                                 |                                                               |                                                               |
| <i>a</i> / Å                                     | 8.324(2)                                                      | 9.8772(6)                                                       | 10.426(4)                                                     | 10.369(6)                                                     |
| <i>b</i> / Å                                     | 9.203(2)                                                      | 18.7760(11)                                                     | 26.794(9)                                                     | 10.369(6)                                                     |
| <i>c</i> / Å                                     | 11.889(3)                                                     | 12.3743(7)                                                      | 14.099(5)                                                     | 37.645(2)                                                     |
| $\alpha$ / °                                     | 84.965(3)                                                     | 90.000                                                          | 90.000                                                        | 90.000                                                        |
| $\beta$ / °                                      | 88.978(3)                                                     | 98.3301(17)                                                     | 107.728(3)                                                    | 90.000                                                        |
| $\gamma$ / °                                     | 69.436(3)                                                     | 90.000                                                          | 90.000                                                        | 90.000                                                        |
| Unit cell volume/ Å <sup>3</sup>                 | 849.3(3)                                                      | 2270.6(2)                                                       | 3752                                                          | 4047.3(4)                                                     |
| Temperature/ K                                   | 296(1)                                                        | 296(1)                                                          | 296(1)                                                        | 296(1)                                                        |
| Z                                                | 1                                                             | 2                                                               | 4                                                             | 4                                                             |
| Radiation type                                   | MoK $\alpha$                                                  | MoK $\alpha$                                                    | MoK $\alpha$                                                  | MoK $\alpha$                                                  |
| Absorption coefficient, $\mu$ / cm <sup>-1</sup> | 0.748                                                         | 1.103                                                           | 0.732                                                         | 0.703                                                         |
| No. of reflection measured                       | 8361                                                          | 22337                                                           | 18478                                                         | 5836                                                          |
| No. of independent reflections                   | 3855                                                          | 5187                                                            | 4314                                                          | 4627                                                          |
| R <sub>int</sub>                                 | 0.0408                                                        | 0.0652                                                          | 0.0272                                                        | 0.0347                                                        |
| Final R <sub>1</sub> values                      | 0.0665 [ $I > 2.5\sigma(I)$ ]                                 | 0.1066 [ $I > 3\sigma(I)$ ]                                     | 0.0791 [ $I > 2\sigma(I)$ ]                                   | 0.0505 [ $I > 2\sigma(I)$ ]                                   |
| Final wR(F <sup>2</sup> ) values                 | 0.1295 [ $I > 2.5\sigma(I)$ ]                                 | 0.1716 [ $I > 3\sigma(I)$ ]                                     | 0.1453 [ $I > 2\sigma(I)$ ]                                   | 0.0923 [ $I > 2\sigma(I)$ ]                                   |
| Goodness of fit on $F^2$                         | 2.766                                                         | 9.108                                                           | 2.541                                                         | 1.513                                                         |

**Table S2.** Morphologies of **C2**, **C4**, **C6**, and **C8** obtained from DMSO and chloroform at different concentrations.

| Compound  | Solvent           | Concentration (mM) | Morphology                                                                            |
|-----------|-------------------|--------------------|---------------------------------------------------------------------------------------|
| <b>C2</b> | DMSO              | 0.001              | 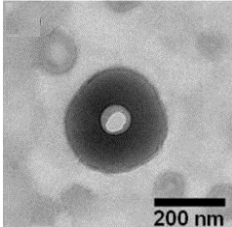   |
|           |                   | 1.0                |    |
|           |                   | 100                |   |
|           | CHCl <sub>3</sub> | 0.001              |  |
|           |                   | 1.0                |  |
|           |                   | 100                |  |

| Compound | Solvent           | Concentration (mM) | Morphology                                                                            |
|----------|-------------------|--------------------|---------------------------------------------------------------------------------------|
| C4       | DMSO              | 0.001              | 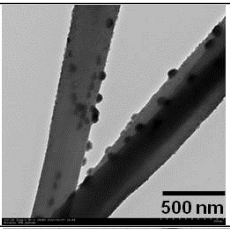   |
|          |                   | 1.0                |    |
|          |                   | 100                |    |
|          | CHCl <sub>3</sub> | 0.001              |   |
|          |                   | 1.0                |  |
|          |                   | 100                |  |

| Compound | Solvent           | Concentration (mM) | Morphology                                                                            |
|----------|-------------------|--------------------|---------------------------------------------------------------------------------------|
| C6       | DMSO              | 0.001              | 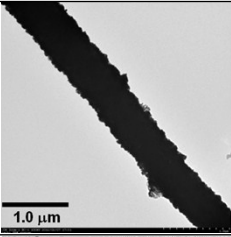   |
|          |                   | 1.0                |    |
|          |                   | 100                |    |
|          | CHCl <sub>3</sub> | 0.001              |   |
|          |                   | 1.0                |  |
|          |                   | 100                |  |

| Compound | Solvent           | Concentration (mM) | Morphology                                                                            |
|----------|-------------------|--------------------|---------------------------------------------------------------------------------------|
| C8       | DMSO              | 0.001              | 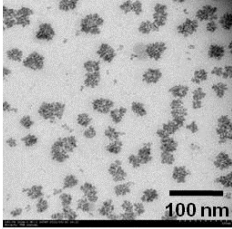   |
|          |                   | 1.0                |    |
|          |                   | 100                |    |
|          | CHCl <sub>3</sub> | 0.001              |   |
|          |                   | 1.0                |  |
|          |                   | 100                |  |
